# Supplementary material for: Unprecedented photochemical induced cascading rearrangement of the 3-azabicyclo[3.3.1]nonane skeletonElectronic supplementary information (ESI) available: experimental details and characterisation data for compounds 8 and 10. See http://www.rsc.org/suppdata/ob/b4/b402200a/
Source: Royal Society of Chemistry journal article supplement (doi:10.1039/b402200a), 2004-01-01
Supplement: b402200a.pdf [file b402200a.pdf]

# Unprecedented Photochemical Induced Cascading Rearrangement of the 3-Azabicyclo[3.3.1]nonane skeleton

Craig M. Williams,\* Ralf Heim, Douglas J. Brecknell and Paul V. Bernhardt<sup>†</sup>

Chemistry Department, School of Molecular and Microbial Sciences, University of Queensland, St. Lucia, 4072, Queensland, Australia

## Experimental

<sup>1</sup>H and <sup>13</sup>C n.m.r spectra were recorded on a Bruker AV400 (400.13MHz; 100.62MHz) or a Bruker AC200 (200.13MHz; 50.32MHz) in deuteriochloroform (CDCl<sub>3</sub>). Coupling constants are given in Hz and chemical shifts are expressed as  $\delta$  values in ppm. High and low resolution EI mass spectral data were obtained on a KRATOS MS 25 RFA. Microanalyses were performed by the University of Queensland Microanalytical Service. Column chromatography was undertaken on silica gel (Flash Silica gel 230–400 mesh), with distilled solvents. Anhydrous solvents were prepared according to Perin and Armarego, 'Purification of laboratory solvents', 3<sup>rd</sup> Ed. Melting points were determined on a Fischer Johns Melting Point apparatus and are uncorrected. Methylmagnesium bromide and *n*-BuLi was purchased from the Aldrich Chem. Co.

## Ethyl 5-bromo-3-methyl-9-[2-oxo-2-(2-hydroxy-3-methoxy)-*E*-ethylidene]-3-azabicyclo[3.3.1]nonanecarboxylate

Ethyl 5-bromo-3-methyl-9-*exo*-hydroxy-9-[2-(3-methoxy-2-isopropoxy)phenylethynyl]-3-azabicyclo[3.3.1]nonanecarboxylate<sup>11</sup> **6** (0.205 g, 0.041 mmol) was rapidly dissolved in trifluoroacetic acid (3 mL) at room temperature. The solution was cooled in an ice-bath and trimethylsilyltrifluorosulfonate (0.23 mL, 1.29 mmol) added rapidly. After addition the flask was taken out of the bath and stirred at room temperature for 1 h. The reaction mixture was then transferred, *via* Pasteur pipette, to a separatory funnel containing a saturated solution of sodium hydrogen carbonate (50 mL) and extracted with dichloromethane (3 x 10 mL). The residue was dried under vacuum, redissolved in anhydrous THF (3 mL) and sodium hydride added until effervescence ceased. The mixture was quenched with saturated ammonium chloride solution and extracted with dichloromethane (3 x 10 mL). Column chromatography (ethyl acetate / dichloromethane, 5:95) afforded the title compound as a bright yellow viscous oil (0.13 g, 70%).

<sup>1</sup>H NMR (400MHz, CDCl<sub>3</sub>)  $\delta$  0.83 (t, J 7.1, 3H), 1.56-1.65 (m, 1H), 2.20 (s, 3H), 2.21-2.28 (m, 2H), 2.40-2.51 (m, 1H), 2.63 (d, J 11.1, 1H), 2.69-2.76 (m, 1H), 2.85 (dd, J 10.6, 2.4, 1H), 2.93-

\* Author to whom correspondence should be addressed (c.williams3@mailbox.uq.edu.au).

<sup>†</sup> To whom correspondence should be made regarding X-ray crystal structure analysis (p.bernhardt@uq.edu.au).

3.07 (m, 2H), 3.50 (dd, J 10.6, 1.3, 1H), 3.66-3.85 (m, 2H), 3.89 (s, 3H), 6.87 (t, J 8.1, 1H), 7.03-7.07 (m, 1H), 7.38 (s, 1H), 7.42 (dd, J 8.1, 1.4, 1H), 12.26 (s, OH).

$^{13}\text{C}$  NMR (100MHz,  $\text{CDCl}_3$ )  $\delta$  13.3, 23.6, 36.3, 44.6, 47.3, 52.4, 56.2, 60.9, 64.1, 71.1, 71.5, 117.1, 118.4, 120.1, 122.6, 123.0, 148.7, 152.7, 153.0, 172.3, 199.5.

Mass spectrum  $m/z$  (EI) 453 ( $\text{M}^+$ , 4%), 451 ( $\text{M}^+$ , 5%), 408 (2), 406 (2), 372 (80), 326 (20), 302 (20), 300 (21), 298 (14), 286 (6), 283 (6), 279 (15), 256 (8), 222 (17), 220 (30), 206 (19), 167 (39), 151 (98), 149 (100), 129 (11), 113 (18).

*Anal.* Calcd. for  $\text{C}_{21}\text{H}_{26}\text{BrNO}_5$ :  $\text{M}^+$  451.0995. Found: 451.0989.

### **Ethyl 5-bromo-3-methyl-9-[2-oxo-2-(2-isopropoxy-3-methoxy)-*E*-ethylidene]-3-azabicyclo[3.3.1]nonanecarboxylate 7**

Ethyl 5-bromo-3-methyl-9-[2-oxo-2-(2-hydroxy-3-methoxy)-*E*-ethylidene]-3-azabicyclo[3.3.1]nonanecarboxylate (0.156 g, 0.345 mmol) was dissolved in *N,N*-dimethylformamide (1.5 mL) followed by addition of 2-bromopropane (0.97 mL, 10.3 mmol) and potassium carbonate (0.095 g, 0.69 mmol). The mixture was then stirred at room temperature for 16 h. Excess 2-bromopropane and *N,N*-dimethylformamide were removed under high vacuum and the residue suspended in dichloromethane (5 mL) and passed through celite. Column chromatography (diethyl ether/light petroleum, ~1:4) of the residue on silica gel afforded the title compound (0.159 g, 93%) as a pale yellow oil.

$^1\text{H}$  NMR (400MHz,  $\text{CDCl}_3$ )  $\delta$  1.22-1.30 (m, 9H), 1.54-1.63 (m, 1H), 1.96-2.05 (m, 1H), 2.17 (s, 3H), 2.36-2.49 (m, 2H), 2.51-2.60 (m, 1H), 2.79 (dd, J 10.7, 2.4, 1H), 2.87 (dd, J 11.1, 2.4, 1H), 2.89-3.03 (m, 1H), 2.97 (dd, J 11.1, 1.3, 1H), 3.28 (dd, J 10.7, 1.3, 1H), 3.82 (s, 3H), 4.13-4.25 (m, 2H), 4.59 (sept, J 6.2, 1H), 6.99-7.07 (m, 2H), 7.42 (AB, 1H).

$^{13}\text{C}$  NMR (100MHz,  $\text{CDCl}_3$ )  $\delta$  14.1, 22.3, 22.4, 23.6, 35.9, 44.8, 46.2, 54.9, 56.1, 61.2, 63.1, 65.4, 71.3, 76.1, 116.1, 122.8, 123.7, 125.7, 134.3, 142.4, 147.0, 153.5, 172.7, 195.3.

Mass spectrum  $m/z$  (EI) 494 ( $\text{M}^+$ , 0.5%), 492 ( $\text{M}^+$ , 0.5%), 414 (77), 368 (7), 354 (7), 340 (2), 326 (9), 315 (1), 302 (11), 300 (12), 283 (2), 256 (2), 220 (27), 208 (5), 206 (8), 193 (49), 174 (2), 151 (100), 148 (6), 146 (5), 134 (6), 120 (4).

*Anal.* Calcd. for  $\text{C}_{24}\text{H}_{32}\text{BrNO}_5$ :  $\text{M}^+$  414.2280 (-HBr). Found: 414.2277.

### **Photolysis of ethyl 5-bromo-3-methyl-9-[2-oxo-2-(2-isopropoxy-3-methoxy)-*E*-ethylidene]-3-azabicyclo[3.3.1]nonanecarboxylate 7**

Ethyl 5-bromo-3-methyl-9-[2-oxo-2-(2-isopropoxy-3-methoxy)-*E*-ethylidene]-3-azabicyclo[3.3.1]nonanecarboxylate **7** (0.171 g, 0.346 mmol) was dissolved in oxygen free *N,N*-

dimethylformamide (150 mL) and irradiated through pyrex in a 1 litre Hanovia photochemical reactor using a 4W arc lamp for 10 days. The solvent was then removed under high vacuum using an in-line trap and the residue subjected to column chromatography (diethyl ether / light petroleum, 3:7 to 6:4), which afforded tricycle **8** (0.030 g, 18%) in fraction one and a mixture of *E* and *Z* enones (1:1) (0.088 g, 51%) in fraction two.

Ethyl 3a-bromo-2-methyl-1,3,3a,4,5,6,7,7a-octahydro-9-(2-isopropoxy-3-methoxyphenyl)-isoindolo[1,7a-b]furan-7-carboxylate **8**.

<sup>1</sup>H NMR (400MHz, CDCl<sub>3</sub>)  $\delta$  1.00 (t, J 7.1, 3H), 1.23 (d, J 6.2, 3H), 1.29 (d, J 6.2, 3H), 1.54-1.82 (m, 3H), 1.84-1.91 (m, 1H), 2.19-2.26 (m, 1H), 2.34-2.44 (m, 1H), 2.51 (s, 3H), 2.83-2.92 (m, 2H), 3.35 (d, J 8.0, 1H), 3.81 (s, 3H), 3.84-4.00 (m, 2H), 4.67 (sept, J 6.2, 1H), 5.63 (s, 1H), 5.67 (s, 1H), 6.80-6.84 (m, 1H), 6.96 (t, J 16, 1H), 7.22-7.27 (m, 1H).

<sup>13</sup>C NMR (100MHz, CDCl<sub>3</sub>)  $\delta$  13.9, 21.3, 22.2, 22.5, 26.3, 34.3, 40.0, 45.9, 55.9, 60.4, 65.18, 65.25, 69.5, 74.2, 94.4, 107.4, 112.7, 119.6, 122.9, 125.2, 144.7, 152.95, 153.04, 173.8.

Mass spectrum m/z (EI) 494 (M<sup>+</sup>, 0.5%), 492 (M<sup>+</sup>, 0.5%), 414 (100), 368 (29), 326 (6), 298 (5), 282 (2), 270 (2), 256 (2), 220 (63), 208 (10), 193 (87), 175 (2), 151 (89), 148 (6), 146 (8), 134 (22), 120 (8).

Anal. Calcd. for C<sub>24</sub>H<sub>32</sub>BrNO<sub>5</sub>: M<sup>+</sup> 414.2280 (-HBr). Found: 414.2279.

### Diethyl 3-(4-methoxyphenylmethyl)-9-[2-oxo-2-(3,4-dimethoxy)ethylidene]-3-azabicyclo[3.3.1]nonane-1,5-dicarboxylate **9**

To diethyl 3-methyl-9-*exo*-hydroxy-9-[2-(3,4-dimethoxy)phenylethynyl]-3-azabicyclo[3.3.1]nonane-1,5-dicarboxylate [7(*exo*):3(*endo*)] (0.430 g, 0.76 mmol) at room temperature was added a mixture of trifluoroacetic acid (0.5 mL) and borontrifluoride diethyl etherate (0.3 mL, 2.36 mmol). After stirring at room temperature for 1 h the reaction mixture was then transferred, *via* Pasture pipette, to a separatory funnel containing a saturated solution of sodium hydrogen carbonate (50 mL) and extracted with dichloromethane (3 x 10 mL). The residue was subjected to column chromatography (diethyl ether / dichloromethane / light petroleum, gradient) afforded the title compound **9** (0.381 g, 89%) (fraction 1) and the corresponding  $\alpha$ -hydroxyketone (0.009 g, 2%) (fraction 2).

Diethyl 3-(4-methoxyphenylmethyl)-9-[2-oxo-2-(3,4-dimethoxy)ethylidene]-3-azabicyclo[3.3.1]nonane-1,5-dicarboxylate **9**, m.p. 168-170 °C.

<sup>1</sup>H NMR (400MHz, CDCl<sub>3</sub>)  $\delta$  0.74 (t, J 7.2, 3H), 1.29 (t, J 7.1, 3H), 1.60-1.71 (m, 1H), 1.99-2.08 (m, 1H), 2.13-2.22 (m, 1H), 2.24-2.42 (m, 2H), 2.66 (dd, J 11.1, 1.6, 1H), 2.82 (dd, J 11.1, 1.6, 1H), 2.90-3.07 (m, 3H), 3.41 (AB, 2H), 3.57-3.74 (m, 2H), 3.79 (s, 3H), 3.89 (s, 3H), 3.93 (s, 3H), 4.14-

4.26 (m, 2H), 6.24 (s, 1H), 6.82-6.87 (m, 3H), 7.19-7.22 (m, 2H), 7.46 (d, J 1.9, 1H), 7.54 (dd, J 8.3, 1.9, 1H).

$^{13}\text{C}$  NMR (100MHz,  $\text{CDCl}_3$ )  $\delta$  13.3, 14.3, 20.9, 36.6, 36.9, 49.9, 53.2, 55.22, 55.97, 55.05, 60.3, 61.0, 61.9, 62.0, 62.5, 109.9, 110.2, 113.8, 119.7, 123.9, 129.8, 130.3, 130.6, 149.1, 152.4, 153.3, 158.7, 173.0, 173.7, 191.5.

Mass spectrum  $m/z$  (EI) 565 ( $\text{M}^+$ , 13%), 536 (2), 520 (3), 492 (10), 474 (2), 444 (4), 429 (2), 416 (2), 400 (16), 385 (2), 370 (3), 354 (4), 343 (2), 330 (1), 312 (3), 297 (1), 278 (1), 263 (2), 206 (1), 191 (1), 180 (2), 165 (26), 121 (100).

*Anal.* Calcd. for  $\text{C}_{32}\text{H}_{39}\text{NO}_8$ : C, 67.95; H, 6.95; N, 2.48;  $\text{M}^+$  565.2676. Found: C, 68.05; H, 7.07; N, 2.34; 565.2676

**Diethyl 2-(4-methoxyphenylmethyl)-1,3,3a,4,5,6,7,7a-octahydro-9-(3,4-dimethoxyphenyl)-isoindolo[1,7a-b]furan-3a,7-dicarboxylate 10**

Diethyl 3-methyl-9-[2-oxo-2-(3,4-dimethoxy)ethylidene]-3-azabicyclo[3.3.1]nonane-1,5-dicarboxylate **9** (0.100 g, 0.177 mmol) was dissolved in oxygen free *N,N*-dimethylformamide (10 mL) under argon in a 10 mm n.m.r tube (PP-528) and irradiated for 1 h with a Hanovia high pressure mercury-xeon vapour lamp (1000W). [Note: the light was passed through a water filter (30 cm long) at  $\sim 5^\circ\text{C}$  and the sample placed 10 cm from the end of the cooling tube.] The solvent was then removed under high vacuum using an in-line trap and the residue subjected to column chromatography (diethyl ether / dichloromethane / light petroleum, gradient), which afforded tricycle **10** (0.076 g, 76%) and recovered starting material **9** (0.012 g, 12%) in that order. Yield based on recovered starting material 86%, m.p. 109-111  $^\circ\text{C}$  (partial), 115-116  $^\circ\text{C}$ .

$^1\text{H}$  NMR (400MHz,  $\text{CDCl}_3$ )  $\delta$  0.99 (t, J 7.1, 3H), 1.23 (t, J 7.1, 3H), 1.55-1.73 (m, 3H), 1.78-1.91 (m, 2H), 2.01-2.11 (m, 1H), 2.52 (d, J 8.7, 1H), 3.10 (d, J 8.7, 1H), 3.14-3.20 (m, 1H), 3.72 (d, J 13.6, 1H), 3.78 (s, 3H), 3.87 (s, 3H), 3.88 (s, 3H), 3.88-4.03 (m, 2H), 4.09-4.17 (m, 2H), 4.16 (d, J 13.6, 1H), 4.90 (s, 1H), 5.90 (s, 1H), 6.78-6.88 (m, 3H), 7.03 (d, J 2.0, 1H), 7.14 (dd, J 2.0, J 8.3, 1H), 7.23-7.28 (m, 2H).

$^{13}\text{C}$  NMR (100MHz,  $\text{CDCl}_3$ )  $\delta$  14.1, 14.2, 21.4, 25.6, 33.1, 46.8, 51.2, 54.4, 55.2, 55.90, 55.93, 56.3, 60.1, 60.3, 60.8, 96.7, 97.9, 108.6, 110.7, 113.7, 118.4, 123.4, 129.6, 131.1, 148.6, 149.5, 157.1, 158.6, 173.9, 174.5.

Mass spectrum  $m/z$  (EI) 565 ( $\text{M}^+$ , 13%), 520 (11), 492 (10), 474 (5), 444 (4), 424 (2), 416 (3), 400 (16), 165 (26), 121 (100).

*Anal.* Calcd. for  $\text{C}_{32}\text{H}_{39}\text{NO}_8$ : C, 67.95; H, 6.95; N, 2.48;  $\text{M}^+$  565.2676. Found: C, 67.79; H, 6.90; N, 2.41; 565.2674.

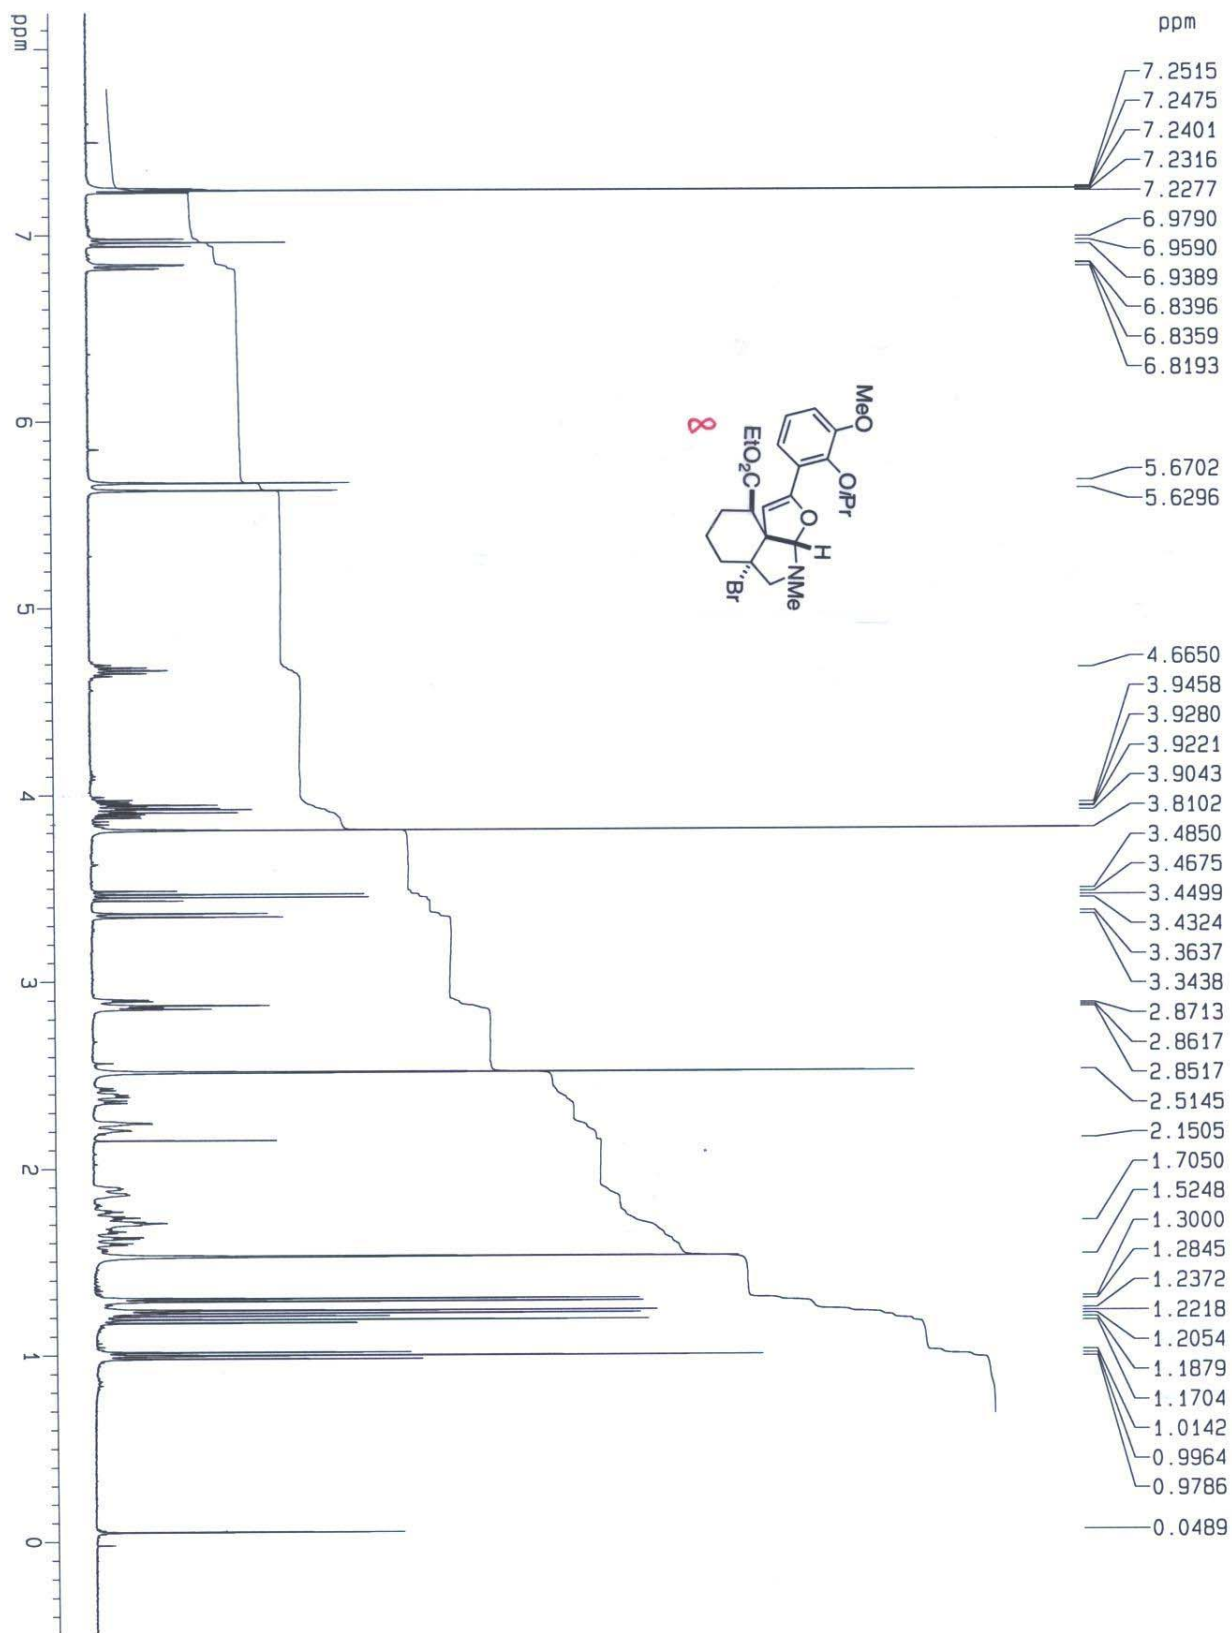

Current Data Parameters

| NAME   | UNKNOWN |
|--------|---------|
| EXPNO  | 1       |
| PROCNO | 1       |

F2 - Acquisition Parameters

| Date_ | 20020410 |
|-------|----------|
| Time  | 10.53    |

|         |                |
|---------|----------------|
| INSTRUM | 5 mm Multinuc1 |
| PROBHD  | z9             |
| PULPROG | zgpg30         |
| TD      | 32768          |
| SOLVENT | CDCl3          |
| NS      | 64             |
| DS      | 0              |
| SWH     | 4807.692 Hz    |
| FIDRES  | 0.146719 Hz    |
| AQ      | 3.4080260 sec  |
| RG      | 406.4          |
| DW      | 104.000 usec   |
| DE      | 6.00 usec      |
| TE      | 305.0 K        |
| D1      | 0.50000002 sec |

===== CHANNEL f1 =====

| NUC1 | <sup>1</sup> H  |
|------|-----------------|
| P1   | 15.60 usec      |
| PL1  | 0.00 dB         |
| SFO1 | 400.1320400 MHz |

F2 - Processing parameters

|     |                 |
|-----|-----------------|
| SI  | 16384           |
| SF  | 400.1300175 MHz |
| WDW | EM              |
| SSB | 0               |
| LB  | 0.00 Hz         |
| GB  | 0               |
| PC  | 1.00            |

1D NMR plot parameters

|       |                 |
|-------|-----------------|
| CX    | 22.00 cm        |
| CY    | 27.72 cm        |
| F1P   | 8.193 ppm       |
| F1    | 3278.39 Hz      |
| F2P   | -0.492 ppm      |
| F2    | -197.05 Hz      |
| PPMCM | 0.39481 ppm/cm  |
| HZCM  | 157.97453 Hz/cm |

Current Data Parameters  
 NAME CW13  
 EXPNO 1  
 PROCNO 1

F2 - Acquisition Parameters  
 Date\_ 20030616  
 Time 12:34  
 INSTRUM spect  
 PROBHD 5 mm Multinucl  
 PULPROG zg  
 TD 32768  
 SOLVENT CDCl3  
 NS 33  
 DS 0  
 SWH 4807.692 Hz  
 FIDRES 0.146719 Hz  
 AQ 3.4080260 sec  
 RG 101.6  
 DW 104.000 usec  
 DE 6.00 usec  
 TE 305.0 K  
 D1 0.60000002 sec

===== CHANNEL f1 =====  
 NUC1 1H  
 P1 5.60 usec  
 PL1 0.00 dB  
 SF01 400.1320400 MHz

F2 - Processing parameters  
 SI 16384  
 SF 400.1300175 MHz  
 WDW EM  
 SSB 0  
 LB 0.00 Hz  
 GB 0  
 PC 1.00

1D NMR plot parameters  
 CX 22.00 cm  
 CY 45.72 cm  
 F1P 10.000 ppm  
 F1 4001.30 Hz  
 F2P -0.500 ppm  
 F2 -200.06 Hz  
 PPMCM 0.47727 ppm/cm  
 HZCM 190.97112 Hz/cm

0.9754  
 0.9932  
 1.0109  
 1.2136  
 1.2315  
 1.2492  
 1.5738  
 1.6175  
 1.6424  
 1.8404  
 2.5104  
 2.5323  
 3.0913  
 3.1131  
 3.7073  
 3.7414  
 3.7845  
 3.8681  
 3.8802  
 3.8957  
 3.9226  
 3.9405  
 3.9655  
 3.9832  
 4.1235  
 4.1277  
 4.1413  
 4.1457  
 4.1492  
 4.1835  
 4.9010  
 5.9017  
 6.7935  
 6.8145  
 6.8330  
 6.8381  
 6.8495  
 6.8548  
 7.0320  
 7.0369  
 7.1238  
 7.1286  
 7.1446  
 7.1495  
 7.2399  
 7.2430  
 7.2647

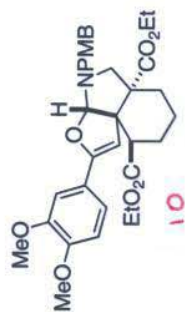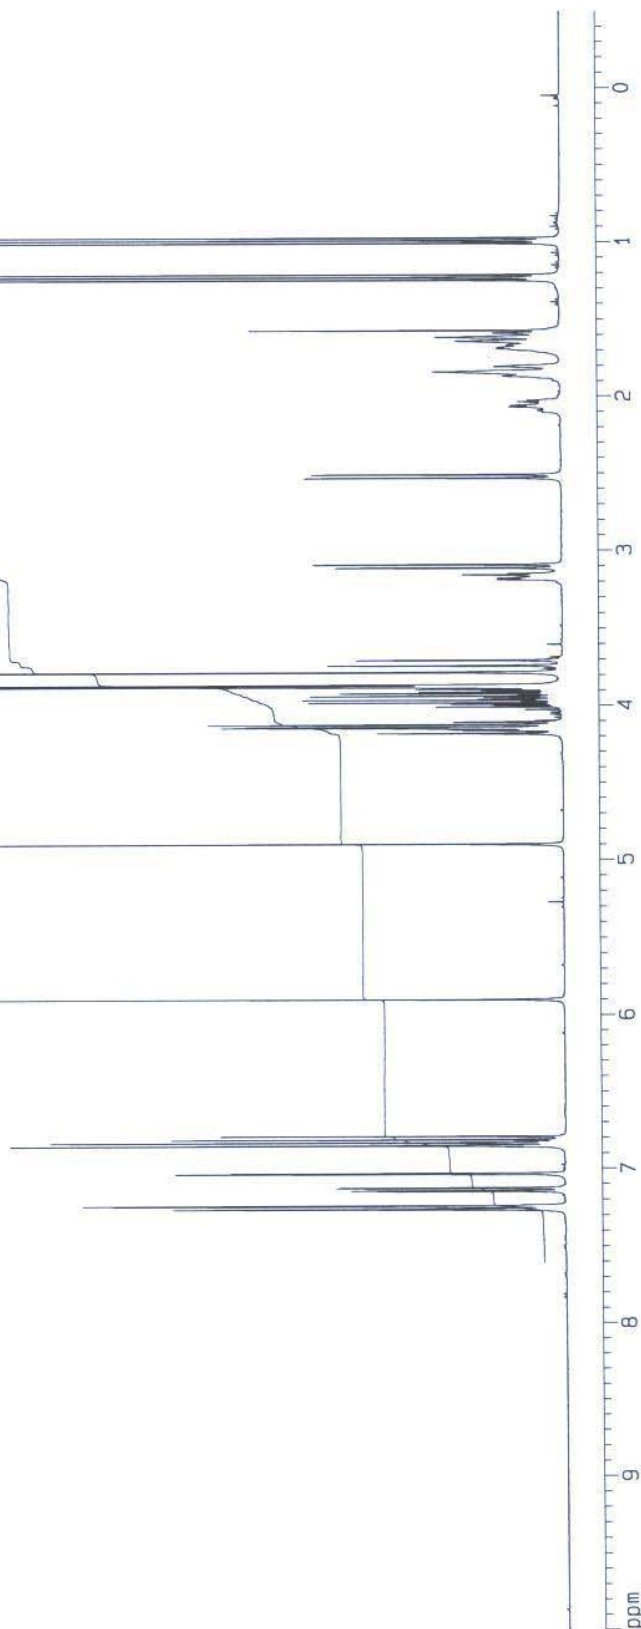

ppm

Current Data Parameters  
NAME CW3  
EXPNO 2  
PROCNO 1

F2 - Acquisition Parameters  
Date\_ 20020413  
Time 23.19  
INSTRUM spect  
PROBHD 5 mm Multinucl  
PULPROG zgpg  
TO 65536  
SOLVENT CDCl3  
NS 7027  
DS 1  
SWH 21739.131 Hz  
FIDRES 0.331713 Hz  
AQ 1.5073780 sec  
RG 14596.5  
DM 23.000 usec  
DE 30.00 usec  
TE 302.0 K  
D1 1.50000000 sec  
d11 0.03000000 sec  
d12 0.00002000 sec

===== CHANNEL f1 =====  
NUC1 13C  
P1 4.50 usec  
PL1 3.00 dB  
SF01 100.6225290 MHz

===== CHANNEL f2 =====  
CPOPRG2 waitz16  
NUC2 1H  
PCPD2 100.00 usec  
PL2 120.00 dB  
PL12 10.20 dB  
PL13 18.00 dB  
SF02 400.1320000 MHz

F2 - Processing parameters  
SI 32768  
SF 100.6127703 MHz  
WDW EM  
SSB 0  
LB 1.00 Hz  
GB 0  
PC 1.00

1D NMR plot parameters  
CX 21.50 cm  
CY 10.72 cm  
F1P 205.026 ppm  
F1 20628.25 Hz  
F2P -11.041 ppm  
F2 -1110.88 Hz  
DPMCM 10.04964 ppm/cm  
HZCM 1011.12231 Hz/cm

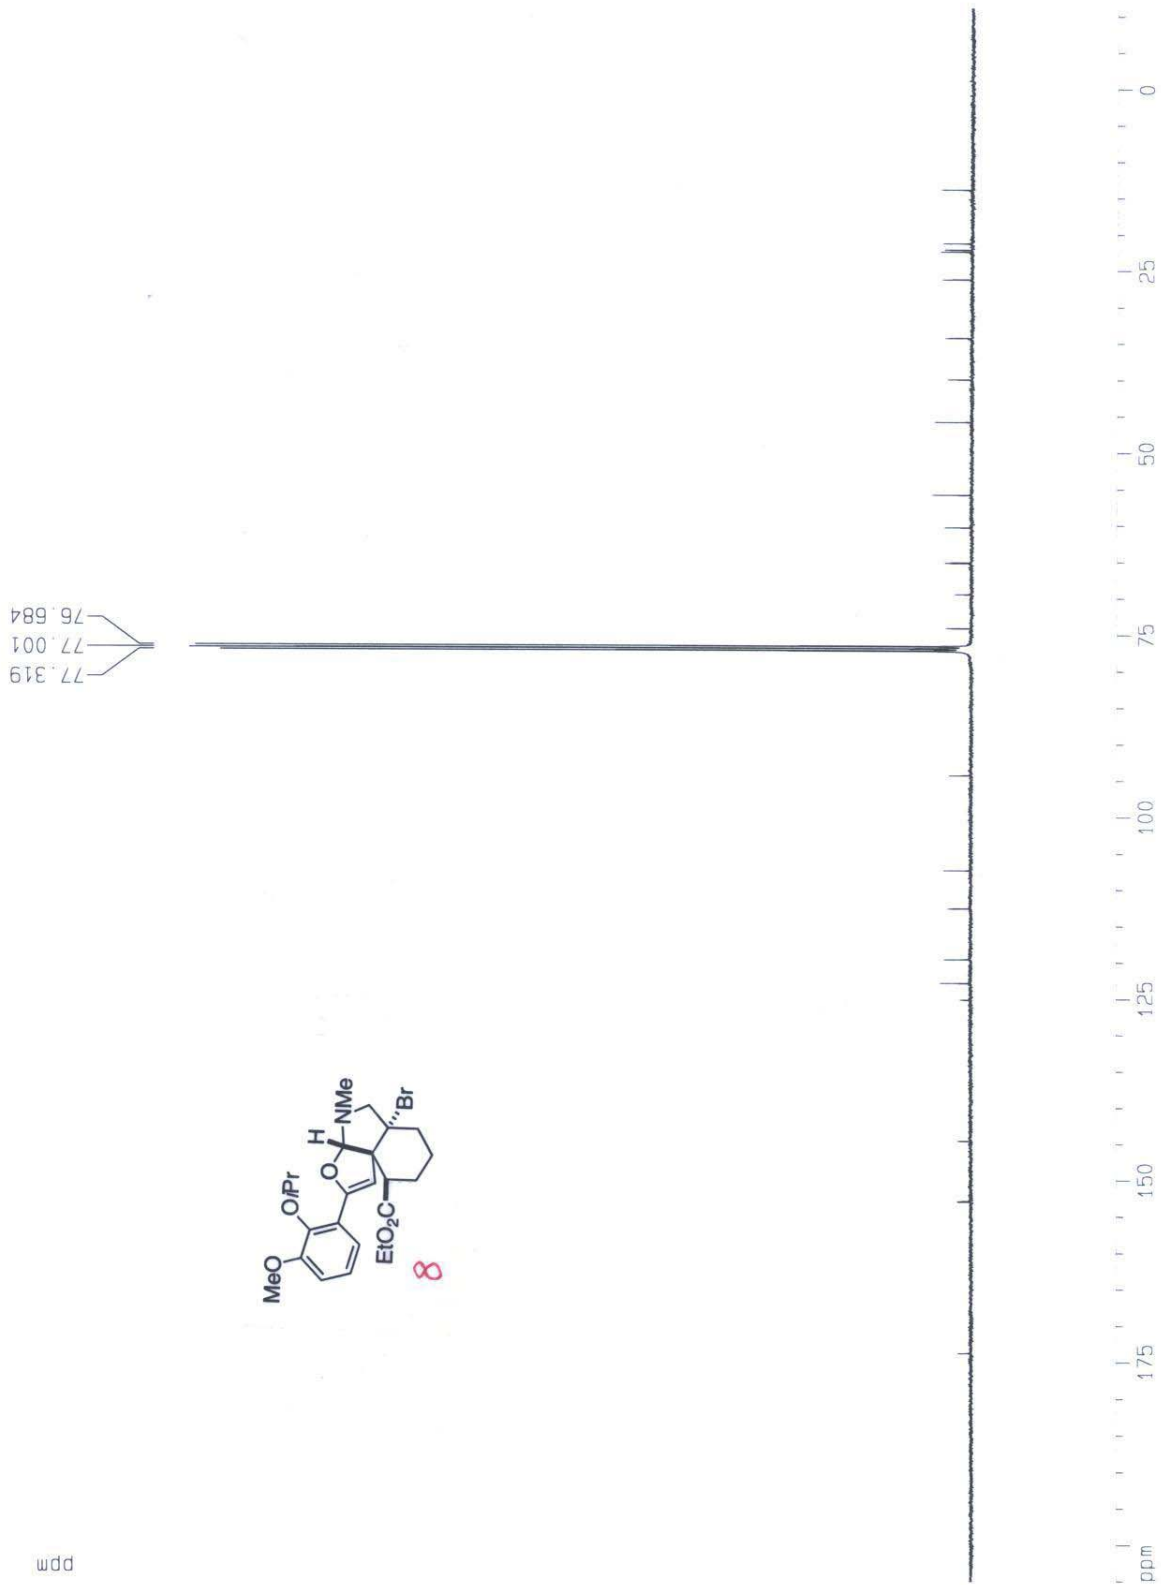



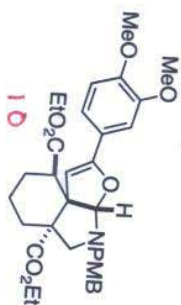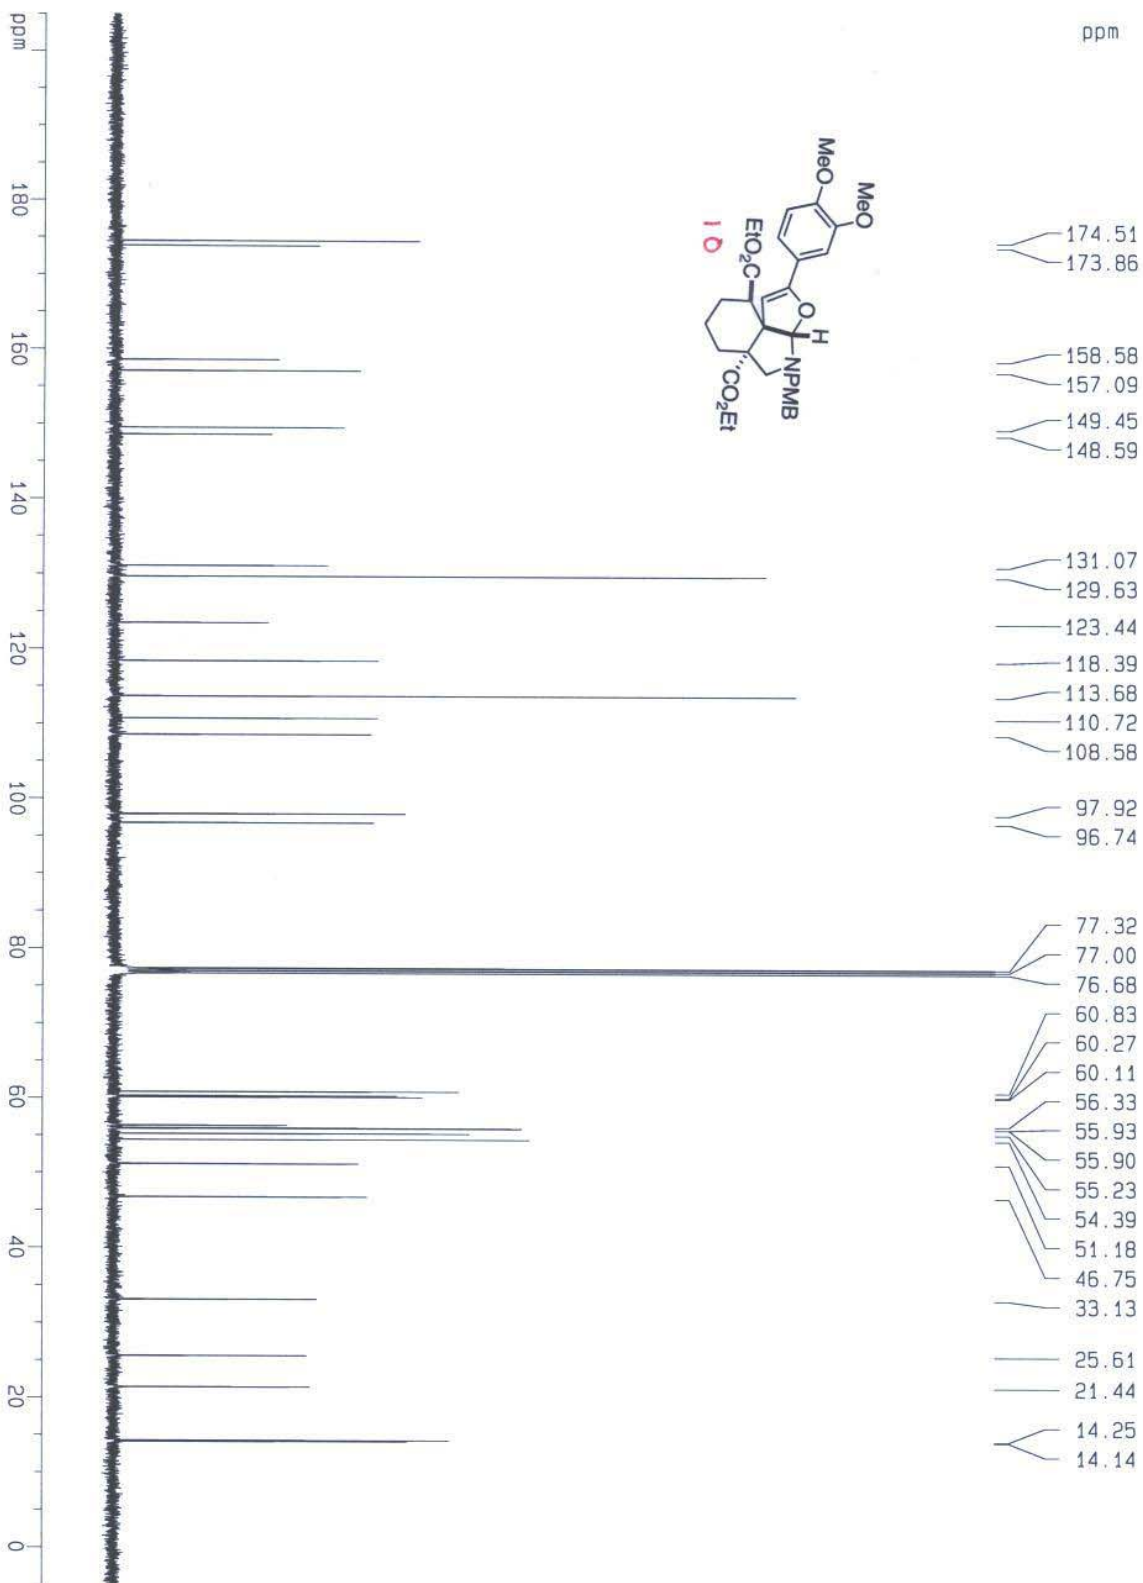

Current Data Parameters  
NAME CM13  
EXPNO 2  
PROCNO 1

F2 - Acquisition Parameters  
Date\_ 20030616  
Time 12.51  
INSTRUM spect  
PROBHD 5 mm Multinuc1  
PULPROG zgpg  
TD 65536  
SOLVENT CDCl3  
NS 2716  
DS 1  
SWH 21739.131 Hz  
FIDRES 0.331713 Hz  
AQ 1.5074010 sec  
RG 14596.5  
DM 23.000 usec  
DE 30.00 usec  
TE 302.0 K  
D1 1.50000000 sec  
d11 0.03000000 sec  
d12 0.00002000 sec

===== CHANNEL f1 =====  
NUC1 13C  
P1 3.80 usec  
PL1 3.00 dB  
SF01 100.625290 MHz

===== CHANNEL f2 =====  
CPDPRG2 waltz16  
NUC2 1H  
PCPD2 100.00 usec  
PL2 120.00 dB  
PL12 19.60 dB  
PL13 26.60 dB  
SF02 400.1320000 MHz

F2 - Processing parameters  
SI 32768  
SF 100.6127723 MHz  
WDW EM  
SSB 0  
LB 0.50 Hz  
GB 0  
PC 1.00

1D NMR plot parameters  
CX 21.50 cm  
CY 21.50 cm  
F1P 205.000 ppm  
F1 20625.62 Hz  
F2P -5.000 ppm  
F2 -503.07 Hz  
PPHCK 9.76744 ppm/cm  
HZCM 982.72943 Hz/cm
